# Supplementary material for: Impact of Foliar Application of Amino Acids on Essential Oil Content, Odor Profile, and Flavonoid Content of Different Mint Varieties in Field Conditions
Source: MDPI journal article supplement (doi:10.3390/plants11212938), 2022-11-01
Supplement: s1 [file s1]

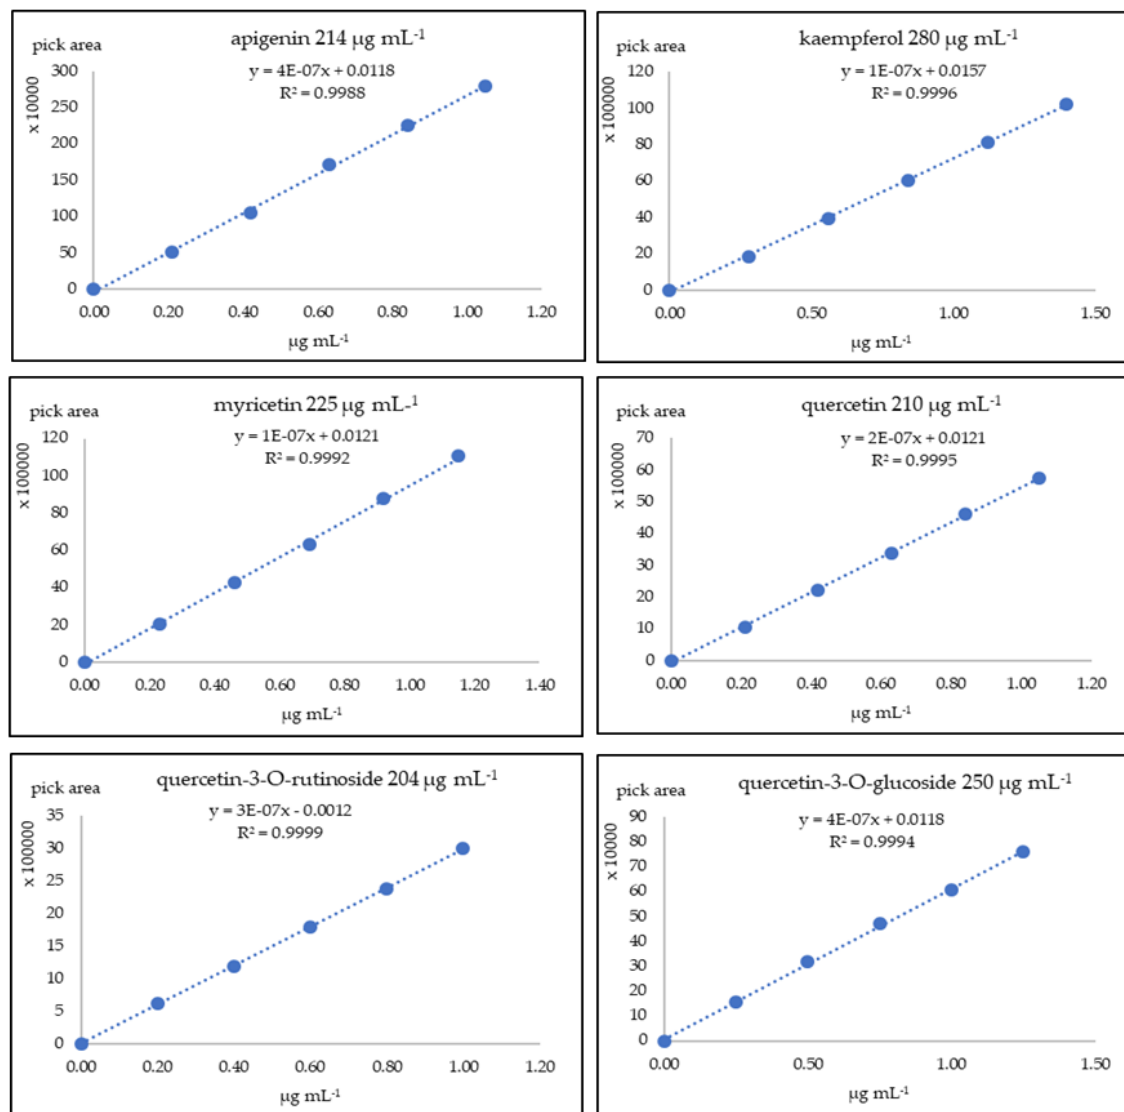

**Figure S1.** Standard curves for all identified flavonoids in *Mentha* species, detection: 370 nm.

**Table S1.** Possible compounds identified by the electronic nose in essential oil of different varieties of mints sprayed with amino acids

| Serial number | Kovats retention | Possible matches compounds | Chemical group of compounds | Sensory descriptors | Species/varieties            |   |   |   |   |   |   |   |                            |   |   |   |   |   |   |   |                              |   |   |   |   |   |   |   |                            |   |   |   |   |   |   |   |                                  |   |   |   |   |   |   |   |
|---------------|------------------|----------------------------|-----------------------------|---------------------|------------------------------|---|---|---|---|---|---|---|----------------------------|---|---|---|---|---|---|---|------------------------------|---|---|---|---|---|---|---|----------------------------|---|---|---|---|---|---|---|----------------------------------|---|---|---|---|---|---|---|
|               |                  |                            |                             |                     | <i>M. spicata</i> 'Moroccan' |   |   |   |   |   |   |   | <i>M. spicata</i> 'Crispa' |   |   |   |   |   |   |   | <i>M. piperita</i> 'Granada' |   |   |   |   |   |   |   | <i>M. piperita</i> 'Swiss' |   |   |   |   |   |   |   | <i>M. piperita</i> 'Multimentha' |   |   |   |   |   |   |   |
|               |                  |                            |                             |                     | Treatment                    |   |   |   |   |   |   |   |                            |   |   |   |   |   |   |   |                              |   |   |   |   |   |   |   |                            |   |   |   |   |   |   |   |                                  |   |   |   |   |   |   |   |
|               |                  |                            |                             |                     | 1                            | 2 | 3 | 4 | 5 | 6 | 7 | 8 | 1                          | 2 | 3 | 4 | 5 | 6 | 7 | 8 | 1                            | 2 | 3 | 4 | 5 | 6 | 7 | 8 | 1                          | 2 | 3 | 4 | 5 | 6 | 7 | 8 | 1                                | 2 | 3 | 4 | 5 | 6 | 7 | 8 |
| 1             | 477              | Propanone                  | Ketones                     | Pungent             | -                            | - | - | + | - | + | - | - | -                          | - | + | - | - | - | - | - | +                            | + | - | - | - | - | + | - | -                          | - | - | - | - | - | - | - | -                                | + | + | - | + | - | - |   |
| 2             | 558              | Tert-Butylmethylether      | Ethers                      | Pungent             | -                            | - | - | - | - | - | - | + | -                          | + | - | - | - | - | - | - | -                            | - | - | - | - | - | - | - | -                          | - | - | - | - | - | - | - | -                                | - | - | - | - | - | - |   |
| 3             | 600              | Ethyl acetate              | Esters                      | Anise               | -                            | - | - | - | - | - | - | - | -                          | - | - | + | + | + | + | - | +                            | + | + | + | - | - | - | - | -                          | - | - | - | - | - | - | - | -                                | - | - | - | - | + | - | + |
| 4             | 639              | Isopropyl acetate          | Esters                      | Fruity              | -                            | - | - | - | - | + | + | + | -                          | - | - | - | - | - | - | - | -                            | - | - | - | - | - | - | - | -                          | - | - | - | - | - | - | - | -                                | - | - | + | - | + |   |   |
| 5             | 657              | n-butanol                  | Alcohols                    | Fruity              | +                            | + | + | + | + | - | + | + | -                          | - | - | - | + | - | - | - | -                            | - | - | - | - | - | - | - | -                          | - | - | - | - | - | - | - | -                                | + | - | - | - | - | - |   |
| 6             | 686              | Acetoin                    | Ketones                     | Butter              | -                            | - | - | - | - | - | - | - | +                          | + | - | + | + | + | - | + | -                            | - | - | - | + | - | - | + | +                          | + | + | + | - | - | - | - | -                                | - | - | - | - | - | - |   |
| 7             | 702              | Methylbutanoate            | Esters                      | Fruity              | -                            | - | - | - | + | - | - | - | -                          | - | - | - | - | - | - | - | -                            | - | - | - | - | - | - | - | -                          | - | - | - | - | - | - | - | -                                | - | - | - | - | - |   |   |
| 8             | 711              | Propyl acetate             | Esters                      | Fruity              | -                            | - | - | - | - | - | - | - | -                          | + | - | - | + | - | - | - | +                            | - | - | + | - | - | - | - | -                          | - | - | - | - | - | - | - | -                                | - | - | - | - | - | - |   |
| 9             | 733              | Isoamyl alcohol            | Alcohols                    | Fruity              | -                            | - | - | + | - | + | - | - | -                          | + | - | - | - | + | + | - | -                            | - | - | - | - | - | - | - | -                          | - | - | - | - | - | - | - | -                                | - | - | + | + | + | - |   |
|               |                  |                            | Sulfides                    | Garlic              | -                            | - | - | - | + | - | + | - | +                          | + | + | + | + | + | - | - | +                            | + | - | + | - | + | + | + | +                          | + | + | + | + | + | + | + | +                                | + | + | + | - | + | - | + |
| 10            | 797              | Butyl acetate              | Esters                      | Fruity              | -                            | - | - | - | - | - | + | - | -                          | - | - | - | - | - | - | - | -                            | - | - | - | - | - | - | - | -                          | - | - | - | - | - | - | - | -                                | - | - | - | - | - | - |   |
| 11            | 802              | Ethyl butyrate             | Esters                      | Fruity              | -                            | - | + | - | - | - | - | - | -                          | - | - | - | - | - | - | - | -                            | - | - | - | - | - | - | - | -                          | - | - | - | - | - | - | - | -                                | - | - | - | - | - | - |   |
| 12            | 820              | Butanoic acid              | Esters                      | Butter              | -                            | - | - | - | - | - | - | - | -                          | - | - | - | - | - | - | + | +                            | - | - | - | - | - | - | - | -                          | - | - | - | - | - | - | - | -                                | - | - | - | - | - | - |   |
| 13            | 830              | Furfural                   | Aldehyde                    | Spice               | -                            | - | - | - | + | - | - | - | -                          | - | + | - | - | - | + | - | -                            | - | + | - | - | - | - | - | +                          | + | - | + | - | + | - | - | -                                | - | - | - | - | - | - |   |
| 14            | 840              | Leaf alcohol               | Alcohols                    | Earthy              | -                            | - | - | + | - | + | - | - | -                          | - | - | - | - | - | - | - | -                            | - | + | - | - | + | - | - | -                          | - | - | - | - | - | - | - | -                                | - | + | - | - | - | - |   |
| 15            | 857              | 2-hexen-ol                 | Alcohols                    | Fruity              | -                            | - | - | - | - | - | - | - | +                          | + | + | + | + | + | - | + | -                            | - | - | - | - | - | + | - | -                          | - | - | - | - | - | - | + | -                                | + | - | - | - | - | - |   |
| 16            | 878              | Isoamyl Acetate            | Esters                      | Fruity              | -                            | - | - | - | - | - | - | - | -                          | - | - | - | - | - | - | - | -                            | - | - | - | - | - | - | - | -                          | - | - | - | + | + | + | - | -                                | - | - | - | - | - |   |   |

[illegible]
